# Supplementary material for: Identification of therapeutic targets from genetic association studies using hierarchical component analysis
Source: BioData Min. 2020 Jun 17;13:6. doi: 10.1186/s13040-020-00216-9 (PMC7301559; doi:10.1186/s13040-020-00216-9)
Supplement: Supplementary file 7 — Additional file 7. [file 13040_2020_216_MOESM7_ESM.csv]

id	do_id	cell_type	pert_ids	umls_cui	curator	platform	ctrl_ids	disease_name	geo_id	organism
dz:46	DOID:4448	Fibroblast	GSM29079,GSM29081,GSM29082,GSM29084,GSM29085,GSM29087,GSM29088,GSM29090,GSM29091,GSM29092,GSM29093,GSM29095,GSM29096,GSM29097,GSM29099,GSM29100,GSM29102,GSM29103	C0024437	Joel.Dudley	GPL8300	GSM29059,GSM29060,GSM29061,GSM29062,GSM29063,GSM29064,GSM29065,GSM29066,GSM29067,GSM29068,GSM29069,GSM29070,GSM29071,GSM29072,GSM29074,GSM29075,GSM29076,GSM29078	macular degeneration	GSE1719	human
dz:110	DOID:7148	Synovial Membrane	GSM34398,GSM34399,GSM34400,GSM34401,GSM34402	C0003873	Joel.Dudley	GPL91	GSM34379,GSM34379,GSM34383,GSM34383,GSM34385,GSM34385,GSM34388,GSM34388,GSM34391,GSM34391	rheumatoid arthritis	GSE1919	human
dz:176	None	Peripheral blood mononuclear cell	GSM187614,GSM187615,GSM187616,GSM187617,GSM187618,GSM187619,GSM187620,GSM187621,GSM187622,GSM187623,GSM187624,GSM187625,GSM187626,GSM187627,GSM187628,GSM187629,GSM187630	C0553662	Joel.Dudley	GPL570	GSM187584,GSM187585,GSM187586,GSM187587,GSM187588,GSM187589,GSM187590,GSM187591,GSM187592,GSM187593,GSM187594,GSM187595,GSM187596,GSM187597,GSM187598,GSM187599,GSM187600,GSM187601,GSM187602,GSM187603,GSM187604,GSM187605,GSM187606,GSM187607,GSM187608,GSM187609,GSM187610,GSM187611,GSM187612,GSM187613	JRA - Juvenile rheumatoid arthritis	GSE7753	human
dz:183	DOID:7148	Peripheral blood mononuclear cell	GSM82640,GSM82641,GSM82642,GSM82643,GSM82644,GSM82645,GSM82646,GSM82647,GSM82648,GSM82649,GSM82650,GSM82651,GSM82652,GSM82653,GSM82654,GSM82655,GSM82656,GSM82657,GSM82658,GSM82659,GSM82660,GSM82661,GSM82662,GSM82663,GSM82664,GSM82665,GSM82666,GSM82667,GSM82668,GSM82669	C0003873	Joel.Dudley	GPL3064	GSM82596,GSM82597,GSM82599,GSM82601,GSM82602,GSM82607,GSM82609,GSM82611,GSM82612,GSM82614,GSM82615,GSM82617,GSM82618,GSM82619	rheumatoid arthritis	GSE3592	human
dz:188	DOID:8577	Peripheral blood mononuclear cell	GSM76030,GSM76031,GSM76032,GSM76033,GSM76034,GSM76035,GSM76036,GSM76037,GSM76038,GSM76039,GSM76040,GSM76041,GSM76042,GSM76043,GSM76044,GSM76045,GSM76046,GSM76047,GSM76048,GSM76049,GSM76050,GSM76051,GSM76052,GSM76053,GSM76054,GSM76055	C0009324	Joel.Dudley	GPL96	GSM76115,GSM76115,GSM76116,GSM76116,GSM76117,GSM76117,GSM76118,GSM76118,GSM76119,GSM76119,GSM76120,GSM76120,GSM76121,GSM76121,GSM76122,GSM76122,GSM76123,GSM76123,GSM76124,GSM76124,GSM76125,GSM76125,GSM76126,GSM76126,GSM76127,GSM76127,GSM76128,GSM76128,GSM76129,GSM76129,GSM76130,GSM76130,GSM76131,GSM76131,GSM76132,GSM76132,GSM76133,GSM76133,GSM76134,GSM76134,GSM76135,GSM76135,GSM76136,GSM76136,GSM…	ulcerative colitis	GSE3365	human
dz:249	DOID:8577	Intestine - Large Intestine - Colon (MMHCC)	GSM155587,GSM155588,GSM155589,GSM155590,GSM155591,GSM155592,GSM155593,GSM155594,GSM155595	C0009324	Joel.Dudley	GPL8300	GSM155564,GSM155564,GSM155565,GSM155565,GSM155566,GSM155566,GSM155567,GSM155567	ulcerative colitis	GSE6731	human
dz:264	DOID:8577	Sigmoid colon	GSM29616,GSM29617,GSM29618,GSM29619,GSM29620,GSM29621,GSM29622,GSM29623,GSM29624,GSM29625	C0009324	Joel.Dudley	GPL284	GSM29595,GSM29595,GSM29596,GSM29596,GSM29597,GSM29597,GSM29598,GSM29598,GSM29599,GSM29599,GSM29600,GSM29600,GSM29601,GSM29601,GSM29602,GSM29602,GSM29603,GSM29603,GSM29604,GSM29604,GSM29605,GSM29605	ulcerative colitis	GSE1710	human
dz:305	DOID:7148	Synovial Membrane	GSM37434,GSM37435,GSM37436,GSM37437	C0003873	Joel.Dudley	GPL1740	GSM37430,GSM37431,GSM37432,GSM37433	rheumatoid arthritis	GSE2053	human
dz:430	DOID:676	Peripheral blood mononuclear cell	GSM23159,GSM23160,GSM23161,GSM23162,GSM23163	C0157917	Joel.Dudley	GPL8300	GSM23185,GSM23185,GSM23185,GSM23186,GSM23186,GSM23186,GSM23187,GSM23187,GSM23187,GSM23188,GSM23188,GSM23188,GSM23189,GSM23189,GSM23189,GSM23190,GSM23190,GSM23190,GSM23191,GSM23191,GSM23191,GSM23192,GSM23192,GSM23192,GSM23193,GSM23193,GSM23193,GSM23194,GSM23194,GSM23194,GSM23195,GSM23195,GSM23195	juvenile rheumatoid arthritis	GSE1402	human
dz:454	DOID:8577	colon	GSM239617,GSM239618,GSM239714,GSM239716,GSM239717	C0375359	garibr01	GPL570	GSM240023,GSM240024,GSM240025,GSM240026,GSM240027	ulcerative colitis	GSE9452	human
dz:551	DOID:0050589	Colon biopsy	GSM95511,GSM95512,GSM95513,GSM95514,GSM95515,GSM95516,GSM95517,GSM95518,GSM95519,GSM95520,GSM95521,GSM95522,GSM95523,GSM95524,GSM95525	None	cadimo	GPL570	GSM95473,GSM95474,GSM95475,GSM95476,GSM95477,GSM95478,GSM95479,GSM95480	inflammatory bowel disease	GSE4183	human
dz:585	DOID:8577	sigmoid colon	GSM282935,GSM282938,GSM282940,GSM282941,GSM282943,GSM282944,GSM282946,GSM282947,GSM282948,GSM282949,GSM282950,GSM282951,GSM282952,GSM282953,GSM282955,GSM282956,GSM282959,GSM282966,GSM282968,GSM282974,GSM283016,GSM283021,GSM283024,GSM283041,GSM283043	C0375359	MicrotaskManic	GPL1708	GSM282855,GSM282856,GSM282857,GSM282858,GSM282859,GSM282860,GSM282861,GSM282862,GSM282863,GSM282864,GSM282865,GSM282866,GSM282867,GSM282868,GSM282869,GSM282870,GSM282871,GSM282872,GSM282904,GSM282910,GSM282913,GSM282915,GSM282921,GSM282927	ulcerative colitis	GSE11223	human
dz:586	DOID:8577	sigmoid colon	GSM282929,GSM282933,GSM282936,GSM282937,GSM282942,GSM282945,GSM282954,GSM282961,GSM282964,GSM282965,GSM282967,GSM282969,GSM282970,GSM282972,GSM282973,GSM282975,GSM282996,GSM282999,GSM283014,GSM283019,GSM283026,GSM283029,GSM283030,GSM283033,GSM283035,GSM283036,GSM283038,GSM283046,GSM283050,GSM283053,GSM283055,GSM283056	C0375359	MicrotaskManic	GPL1708	GSM282855,GSM282856,GSM282857,GSM282858,GSM282859,GSM282860,GSM282861,GSM282862,GSM282863,GSM282864,GSM282865,GSM282866,GSM282867,GSM282868,GSM282869,GSM282870,GSM282871,GSM282872,GSM282904,GSM282910,GSM282913,GSM282915,GSM282921,GSM282927	ulcerative colitis	GSE11223	human
dz:587	DOID:8577	terminal ileum	GSM282957,GSM282958,GSM282960,GSM282971,GSM283015	C0375359	MicrotaskManic	GPL1708	GSM282873,GSM282874,GSM282875,GSM282905,GSM282914,GSM282918	ulcerative colitis	GSE11223	human
dz:588	DOID:8577	descending colon	GSM282962,GSM282963,GSM282977,GSM282978,GSM282987,GSM282988,GSM282989,GSM282990,GSM282991,GSM282992,GSM282993,GSM282994,GSM282995,GSM283020,GSM283023	C0375359	MicrotaskManic	GPL1708	GSM282876,GSM282877,GSM282878,GSM282879,GSM282880,GSM282881,GSM282882,GSM282883,GSM282884,GSM282885,GSM282886,GSM282887,GSM282888,GSM282889,GSM282890,GSM282902,GSM282903,GSM282907,GSM282909,GSM282912,GSM282920,GSM282924	ulcerative colitis	GSE11223	human
dz:589	DOID:8577	descending colon	GSM282930,GSM282932,GSM282934,GSM282976,GSM282979,GSM282998,GSM283013,GSM283017,GSM283018,GSM283025,GSM283028,GSM283032,GSM283037,GSM283040,GSM283042,GSM283045,GSM283048,GSM283052,GSM283054	C0375359	MicrotaskManic	GPL1708	GSM282876,GSM282877,GSM282878,GSM282879,GSM282880,GSM282881,GSM282882,GSM282883,GSM282884,GSM282885,GSM282886,GSM282887,GSM282888,GSM282889,GSM282890,GSM282902,GSM282903,GSM282907,GSM282909,GSM282912,GSM282920,GSM282924	ulcerative colitis	GSE11223	human
dz:590	DOID:8577	ascending colon	GSM282931,GSM282939,GSM282981,GSM282983,GSM282985,GSM283000,GSM283001,GSM283002,GSM283003,GSM283004,GSM283005,GSM283006,GSM283007,GSM283008,GSM283009,GSM283010,GSM283011,GSM283022,GSM283034,GSM283049,GSM283051	C0375359	MicrotaskManic	GPL1708	GSM282891,GSM282892,GSM282893,GSM282894,GSM282895,GSM282896,GSM282897,GSM282898,GSM282899,GSM282900,GSM282901,GSM282906,GSM282908,GSM282911,GSM282916,GSM282919,GSM282923	ulcerative colitis	GSE11223	human
dz:591	DOID:8577	ascending colon	GSM282980,GSM282982,GSM282984,GSM282986,GSM282997,GSM283012,GSM283027,GSM283031,GSM283039,GSM283044,GSM283047	C0375359	MicrotaskManic	GPL1708	GSM282891,GSM282892,GSM282893,GSM282894,GSM282895,GSM282896,GSM282897,GSM282898,GSM282899,GSM282900,GSM282901,GSM282906,GSM282908,GSM282911,GSM282916,GSM282919,GSM282923	ulcerative colitis	GSE11223	human
dz:593	DOID:8577	sigmoid colon	GSM282929,GSM282933,GSM282936,GSM282937,GSM282942,GSM282945,GSM282954,GSM282961,GSM282964,GSM282965,GSM282967,GSM282969,GSM282970,GSM282972,GSM282973,GSM282975,GSM282996,GSM282999,GSM283014,GSM283019,GSM283026,GSM283029,GSM283030,GSM283033,GSM283035,GSM283036,GSM283038,GSM283046,GSM283050,GSM283053,GSM283055,GSM283056	C0375359	MicrotaskManic	GPL1708	GSM282917,GSM282922,GSM282926	ulcerative colitis	GSE11223	human
dz:594	DOID:8577	colon mucosa	GSM915455,GSM915456,GSM915457,GSM915458,GSM915459	C0375359	rcaneva	GPL13158	GSM915451,GSM915452,GSM915453,GSM915454	ulcerative colitis	GSE37283	human
dz:710	DOID:8577	Intestinal biopsies	GSM1012178,GSM1012180,GSM560969,GSM560970,GSM560971,GSM560972,GSM560973,GSM560974,GSM560975,GSM560976	C0375359	cadimo	GPL570	GSM1012177,GSM1012179,GSM560961,GSM560962,GSM560963,GSM560964,GSM560965,GSM560966,GSM560967,GSM560968	ulcerative colitis	GSE22619	human
dz:757	DOID:8778	Colon	GSM155575,GSM155576,GSM155577,GSM155578,GSM155579,GSM155580,GSM155581,GSM155582,GSM155583,GSM155584,GSM155585,GSM155586	C0156146	MicrotaskManic	GPL8300	GSM155564,GSM155565,GSM155566,GSM155567	Crohn's disease	GSE6731	human
dz:758	DOID:8778	Colon	GSM155568,GSM155569,GSM155570,GSM155571,GSM155572,GSM155573,GSM155574	C0156146	MicrotaskManic	GPL8300	GSM155564,GSM155565,GSM155566,GSM155567	Crohn's disease	GSE6731	human
dz:759	DOID:8577	Colon	GSM155592,GSM155593,GSM155594,GSM155595	C0375359	MicrotaskManic	GPL8300	GSM155564,GSM155565,GSM155566,GSM155567	ulcerative colitis	GSE6731	human
dz:760	DOID:8577	Colon	GSM155587,GSM155588,GSM155589,GSM155590,GSM155591	C0375359	MicrotaskManic	GPL8300	GSM155564,GSM155565,GSM155566,GSM155567	ulcerative colitis	GSE6731	human
dz:762	DOID:8577	PBMC (peripheral blood mononuclear cells)	GSM76030,GSM76031,GSM76032,GSM76033,GSM76034,GSM76035,GSM76036,GSM76037,GSM76038,GSM76039,GSM76040,GSM76041,GSM76042,GSM76043,GSM76044,GSM76045,GSM76046,GSM76047,GSM76048,GSM76049,GSM76050,GSM76051,GSM76052,GSM76053,GSM76054,GSM76055	C0375359	MicrotaskManic	GPL96	GSM76115,GSM76116,GSM76117,GSM76118,GSM76119,GSM76120,GSM76121,GSM76122,GSM76123,GSM76124,GSM76125,GSM76126,GSM76127,GSM76128,GSM76129,GSM76130,GSM76131,GSM76132,GSM76133,GSM76134,GSM76135,GSM76136,GSM76137,GSM76138,GSM76139,GSM76140,GSM76141,GSM76142,GSM76143,GSM76144,GSM76145,GSM76146,GSM76147,GSM76148,GSM76149,GSM76150,GSM76151,GSM76152,GSM76153,GSM76154,GSM76155,GSM76156	ulcerative colitis	GSE3365	human
dz:779	DOID:7148	Synovial fluid macrophages	GSM265020,GSM265036,GSM265361,GSM265363,GSM265366	C0003873	cadimo	GPL8300	GSM265436,GSM265439,GSM265445	rheumatoid arthritis	GSE10500	human
dz:794	DOID:8778	Peripheral blood mononuclear cells	GSM76056,GSM76057,GSM76058,GSM76059,GSM76060,GSM76061,GSM76062,GSM76063,GSM76064,GSM76065,GSM76066,GSM76067,GSM76068,GSM76069,GSM76070,GSM76071,GSM76072,GSM76073,GSM76074,GSM76075,GSM76076,GSM76077,GSM76078,GSM76079,GSM76080,GSM76081,GSM76082,GSM76083,GSM76084,GSM76085,GSM76086,GSM76087,GSM76088,GSM76089,GSM76090,GSM76091,GSM76092,GSM76093,GSM76094,GSM76095,GSM76096,GSM76097,GSM76098,GSM76099,GSM…	C0156146	cadimo	GPL96	GSM76115,GSM76116,GSM76117,GSM76118,GSM76119,GSM76120,GSM76121,GSM76122,GSM76123,GSM76124,GSM76125,GSM76126,GSM76127,GSM76128,GSM76129,GSM76130,GSM76131,GSM76132,GSM76133,GSM76134,GSM76135,GSM76136,GSM76137,GSM76138,GSM76139,GSM76140,GSM76141,GSM76142,GSM76143,GSM76144,GSM76145,GSM76146,GSM76147,GSM76148,GSM76149,GSM76150,GSM76151,GSM76152,GSM76153,GSM76154,GSM76155,GSM76156	Crohn's disease	GSE3365	human
dz:810	DOID:8577	Intestinal mucosa	GSM948563,GSM948564,GSM948565,GSM948566,GSM948567,GSM948568,GSM948569,GSM948570,GSM948571,GSM948572,GSM948573,GSM948574,GSM948575,GSM948576,GSM948577,GSM948578,GSM948579,GSM948580,GSM948581,GSM948582,GSM948583,GSM948584,GSM948585,GSM948586,GSM948587,GSM948588,GSM948589,GSM948590,GSM948591,GSM948592	C0375359	gswaminath	GPL570	GSM948550,GSM948551,GSM948552,GSM948553,GSM948554,GSM948555,GSM948556,GSM948557,GSM948558,GSM948559,GSM948560,GSM948561,GSM948562	ulcerative colitis	GSE38713	human
dz:904	DOID:7148	Peripheral blood mononuclear cells	GSM389703,GSM389704,GSM389706,GSM389708,GSM389711,GSM389714,GSM389716,GSM389717,GSM389719,GSM389721,GSM389722,GSM389724,GSM389726,GSM389727,GSM389730,GSM389731,GSM389733,GSM389735	C0003873	cadimo	GPL6102	GSM389705,GSM389707,GSM389709,GSM389710,GSM389712,GSM389713,GSM389715,GSM389718,GSM389720,GSM389723,GSM389725,GSM389728,GSM389729,GSM389732,GSM389734	rheumatoid arthritis	GSE15573	human
dz:923	DOID:8577	Colonic mucosa - Inflamed	GSM239617,GSM239618,GSM239714,GSM239716,GSM239717,GSM239718,GSM239719,GSM239720	C0375359	cadimo	GPL570	GSM240023,GSM240024,GSM240025,GSM240026,GSM240027	ulcerative colitis	GSE9452	human
dz:924	DOID:8577	Colonic mucosa - Non-Inflamed	GSM239723,GSM239725,GSM239726,GSM239727,GSM239729,GSM239730,GSM239731,GSM239732,GSM240022,GSM240028,GSM240029,GSM240030,GSM240031	C0375359	cadimo	GPL570	GSM240023,GSM240024,GSM240025,GSM240026,GSM240027	ulcerative colitis	GSE9452	human
dz:992	DOID:8778	sigmoid colons (mucosal biopsy)	GSM29606,GSM29607,GSM29608,GSM29609,GSM29610,GSM29611,GSM29612,GSM29613,GSM29614,GSM29615	C0156146	cadimo	GPL284	GSM29595,GSM29596,GSM29597,GSM29598,GSM29599,GSM29600,GSM29601,GSM29602,GSM29603,GSM29604,GSM29605	Crohn's disease	GSE1710	human
dz:993	DOID:8577	sigmoid colons (mucosal biopsy)	GSM29616,GSM29617,GSM29618,GSM29619,GSM29620,GSM29621,GSM29622,GSM29623,GSM29624,GSM29625	C0375359	cadimo	GPL284	GSM29595,GSM29596,GSM29597,GSM29598,GSM29599,GSM29600,GSM29601,GSM29602,GSM29603,GSM29604,GSM29605	ulcerative colitis	GSE1710	human
